# Supplementary material
Source: ML conference proceedings conference paper supplement (https://openreview.net/forum?id=84fOBZlOiV)
Supplement: supplementary_material [file attachment]

## A APPENDIX

### A.1 GENERAL SYMBOLS

Revisit the meaning of symbols.

|                                 |                                                                                          |
|---------------------------------|------------------------------------------------------------------------------------------|
| $x$                             | input latent variables                                                                   |
| $\xi$                           | multivariate Gaussian noises (injected to $x$ ) $\sim \mathcal{N}^n(\mathbf{0}, \Sigma)$ |
| $w$                             | input weight vector                                                                      |
| $b$                             | bias vector                                                                              |
| $u$                             | input of an activation function, equals $w^\top(x + \xi)$                                |
| $\tilde{\sigma}^2$              | variance of $u$ , equals $w^\top \Sigma w$                                               |
| $\{\gamma_1, \dots, \gamma_p\}$ | scaling factor set. e.g. $\{0.64, 1.13\}$                                                |
| subscript $i$                   | $i$ -th unit of a layer                                                                  |
| superscript $(k)$               | $k$ -th layer of a network                                                               |

For simplicity of the derivation, denote:

$$z \triangleq w^\top x + b$$

$$\tau \triangleq w^\top \xi$$

where  $z$  represents the zero-noise component (center) inside the activation function, and  $\tau$ , the uncertainty component. Then,

$$u + b = z + \tau$$

The following results depend on the fact that Gaussian distribution is *stable* – a linear combination of Gaussian random variables  $\sim \mathcal{N}^n(0, \Sigma)$  is still a Gaussian random variable  $\sim \mathcal{N}(0, w^\top \Sigma w)$ .

### A.2 DERIVATION OF QUASI-LINEAR GAIN AND BIAS FOR **tanh** (AND SIGMOIDAL) LAYERS

We use a linear combination of error functions with different scaling factors to approximate tanh function. In our experiments, a set of two scaling parameters,  $\{0.64, 1.13\}$ , is enough to maintain a favorable error. In practice, one can add more terms for even higher accuracy without losing efficiency (depending on the computing resources), because the extra terms can be easily paralleled.

$$\mathbf{tanh}(u + b) \approx \frac{1}{p} \sum_{j=1}^p \mathbf{erf}[\gamma_j(u + b)]$$

Thus, the quasilinear gain  $N$  and bias  $M$  of a single unit in a **tanh** layer are

$$N = \mathbb{E} \left[ \frac{d}{du} \left( \frac{1}{p} \sum_{j=1}^p \mathbf{erf}[\gamma_j(u + b)] \right) \right]$$

$$M = \mathbb{E} \left[ \frac{1}{p} \sum_{j=1}^p \mathbf{erf}[\gamma_j(u + b)] \right]$$
(35)

To find quasilinear gain  $N$

$$\begin{aligned} & \mathbb{E} \left[ \frac{d}{du} \mathbf{erf}(\gamma(u + b)) \right] \\ &= \int \left[ \frac{d}{du} \mathbf{erf}(\gamma(u + b)) \right] p(\tau) d\tau \\ &= \int_{-\infty}^{\infty} \frac{2\gamma}{\sqrt{\pi}} \mathbf{exp}[-\gamma^2(z + \tau)^2] \frac{1}{\sqrt{2\pi\tilde{\sigma}^2}} \mathbf{exp}\left[-\frac{\tau^2}{2\tilde{\sigma}^2}\right] d\tau \\ &= \frac{\sqrt{2}\gamma}{\pi\tilde{\sigma}} \int_{-\infty}^{\infty} \mathbf{exp}\left[-\gamma^2(z + \tau)^2 - \frac{\tau^2}{2\tilde{\sigma}^2}\right] d\tau \end{aligned}$$

complete the square

$$= \frac{\sqrt{2}\gamma}{\pi\tilde{\sigma}} \int_{-\infty}^{\infty} \mathbf{exp} \left[ - \left( \sqrt{\frac{1}{2\tilde{\sigma}^2} + \gamma^2} \tau + \frac{\gamma^2 z}{\sqrt{\frac{1}{2\tilde{\sigma}^2} + \gamma^2}} \right)^2 + \frac{\gamma^4 z^2}{2\tilde{\sigma}^2 + \gamma^2} - \gamma^2 z^2 \right] d\tau$$

use substitution  $\nu = \sqrt{\frac{1}{2\tilde{\sigma}^2} + \gamma^2} \tau + \frac{\gamma^2 z}{\sqrt{\frac{1}{2\tilde{\sigma}^2} + \gamma^2}}$  then  $d\nu = \sqrt{\frac{1}{2\tilde{\sigma}^2} + \gamma^2} d\tau$

$$\begin{aligned} &= \frac{\sqrt{2}\gamma}{\pi\tilde{\sigma}} \int_{-\infty}^{\infty} \frac{1}{\sqrt{\frac{1}{2\tilde{\sigma}^2} + \gamma^2}} \mathbf{exp} \left[ -\nu^2 + \frac{\gamma^4 z^2}{2\tilde{\sigma}^2 + \gamma^2} - \gamma^2 z^2 \right] d\nu \\ &= \frac{\gamma}{\sqrt{2\pi}\tilde{\sigma}\sqrt{\frac{1}{2\tilde{\sigma}^2} + \gamma^2}} \mathbf{exp} \left[ \frac{\gamma^4 z^2}{2\tilde{\sigma}^2 + \gamma^2} - \gamma^2 z^2 \right] \int_{-\infty}^{\infty} \frac{2}{\sqrt{\pi}} \mathbf{exp}(-\nu^2) d\nu \end{aligned}$$

since  $\int_{-\infty}^{\infty} \frac{2}{\sqrt{\pi}} \mathbf{exp}(-\nu^2) d\nu = 2$ , simplify and get

$$\begin{aligned} &= \frac{2}{\sqrt{\pi}} \frac{\gamma}{\sqrt{2\gamma^2\tilde{\sigma}^2 + 1}} \mathbf{exp} \left[ -\frac{\gamma^2 z^2}{2\gamma^2\tilde{\sigma}^2 + 1} \right] \\ &= \frac{2}{\sqrt{2\pi}} \left( \frac{2\gamma^2\tilde{\sigma}^2 + 1}{2\gamma^2} \right)^{-\frac{1}{2}} \mathbf{exp} \left[ -\frac{1}{2} \frac{z^2}{(2\gamma^2\tilde{\sigma}^2 + 1)/(2\gamma^2)} \right] \end{aligned}$$

which can be rewritten with standard Gaussian pdf  $\varphi(\cdot)$

$$= \frac{2}{\hat{\sigma}} \varphi \left( \frac{z}{\hat{\sigma}} \right)$$

where  $\hat{\sigma}^2 = \frac{2\gamma^2\tilde{\sigma}^2 + 1}{2\gamma^2}$ . Therefore,

$$N = \frac{1}{p} \sum_{j=1}^p \mathbb{E} \left[ \frac{d}{du} \mathbf{erf} [\gamma_j(u + b)] \right] = \frac{2}{p} \sum_{j=1}^p \frac{1}{\hat{\sigma}_j} \varphi \left( \frac{z}{\hat{\sigma}_j} \right)$$

where

$$\hat{\sigma}_j^2 = \frac{2\gamma_j^2\tilde{\sigma}^2 + 1}{2\gamma_j^2}$$

To find the quasilinear bias  $M$ ,

$$\begin{aligned} &\mathbb{E}[\mathbf{erf}(\gamma(u + b))] \\ &= \int \mathbf{erf}(\gamma(u + b)) p(\tau) d\tau \\ &= \int \frac{d}{du} \left[ \int \mathbf{erf}(\gamma(u + b)) p(\tau) d\tau \right] du \\ &= \int \int \left[ \frac{d}{du} \mathbf{erf}(\gamma(u + b)) \right] p(\tau) d\tau du \\ &= \int \mathbb{E} \left[ \frac{d}{du} \mathbf{erf}(\gamma(u + b)) \right] du \end{aligned}$$

since  $u = z + \tau - b$ ,  $du = dz$

also  $\frac{d}{du} \mathbf{erf}(\gamma(u+b)) = \frac{d}{dz} \mathbf{erf}(\gamma(u+b))$ , then

$$\begin{aligned} &= \int_0^z \frac{2}{\hat{\sigma}} \varphi\left(\frac{z}{\hat{\sigma}}\right) dz \\ &= 2\Phi\left(\frac{z}{\hat{\sigma}}\right) - 1 \quad \text{where } \Phi(\cdot) \text{ is the standard Gaussian cdf} \\ &= \mathbf{erf}\left(\frac{z}{\sqrt{2\hat{\sigma}^2}}\right) \end{aligned}$$

Therefore,

$$M = \frac{1}{p} \sum_{j=1}^p \mathbb{E}[\mathbf{erf}(\gamma_j(u+b))] = \frac{1}{p} \sum_{j=1}^p \mathbf{erf}\left(\frac{z}{\sqrt{2\hat{\sigma}_j^2}}\right)$$

The derivation of SL model for the whole **tanh** layers is similar to its single unit counterpart (see below). However, one should note when replacing weight vector  $w$  with weight matrix (of  $k^{\text{th}}$  layer)  $w^{(k)}$ , the **exp** terms yield matrices, but we only need to calculate the diagonal entries. Lastly, the SL model of layers with sigmoidal activations (e.g. logistic) can be obtained in a similar way.

$$N^{(k)} = \frac{2}{p} \sum_{j=1}^p \frac{1}{\hat{\sigma}_j^{(k)}} \odot \varphi\left(\frac{z^{(k)}}{\hat{\sigma}_j^{(k)}}\right) \quad (36)$$

$$M^{(k)} = \frac{1}{p} \sum_{j=1}^p \mathbf{erf}\left(\frac{z^{(k)}}{\sqrt{2\hat{\sigma}_j^{(k)2}}}\right) \quad (37)$$

where

$$\hat{\sigma}_j^{(k)2} = \frac{2\gamma_j^2 \tilde{\sigma}^{(k)2} + 1}{2\gamma_j^2} \quad \text{and} \quad \tilde{\sigma}^{(k)2} = \mathbf{diag}\left(w^{(k)\top} \Sigma^{(k-1)} w^{(k)}\right) \quad (38)$$

### A.3 DERIVATION OF QUASI-LINEAR GAIN AND BIAS FOR **softplus** LAYERS

The derivation of quasi-linear gain and bias for a **softplus** layer is related to that for a **sigmoid** layer (section 5.1), since the derivative of the **softplus** function is the **sigmoid** function, and the latter can be approximated with a linear combination of Gaussian cdf. We have

$$\mathbf{softplus}(u+b) = \frac{1}{\beta} \log(1 + e^{\beta(u+b)})$$

For simplicity, we choose  $\beta = 1$  as default value. Then we use the following approximation

$$\frac{d}{du} \mathbf{softplus}(u+b) = \frac{1}{1 + e^{-(u+b)}} \approx \frac{1}{p} \sum_{j=1}^p \Phi\left(\frac{\gamma_j}{\sqrt{2}}(u+b)\right)$$

Here  $\Phi(\cdot)$  is the standard normal cdf, which can be rewritten by error function

$$\Phi\left(\frac{\gamma}{\sqrt{2}}(u+b)\right) = \frac{1}{2} \left(1 + \mathbf{erf}\left(\frac{\gamma(u+b)}{2}\right)\right)$$

There are two reasons that we use the error function. The first is to reuse the derivation of  $\mathbb{E}[\mathbf{erf}(\gamma(u+b))]$  in the previous section; the second is that calculating Gaussian cdf is computationally demanding, while the approximation algorithm of the error function is available [Cody \(1969\)](#). We also convert our final answer to complementary error function **erfc** to avoid subtractive cancellation that leads to inaccuracy in the tails. Now the quasilinear gain  $N$  becomes

$$N = \mathbb{E}\left[\frac{d}{du} \mathbf{softplus}(u+b)\right] \approx \frac{1}{p} \sum_{j=1}^p \Phi\left(\frac{z}{\hat{\sigma}_j}\right) = \frac{1}{2p} \sum_{j=1}^p \mathbf{erfc}\left(-\frac{z}{\sqrt{2\hat{\sigma}_j^2}}\right)$$

where

$$\hat{\sigma}_j^2 = \frac{2 \left(\frac{\gamma_j}{2}\right)^2 \tilde{\sigma}^2 + 1}{2 \left(\frac{\gamma_j}{2}\right)^2} = \frac{\gamma_j^2 \tilde{\sigma}^2 + 2}{\gamma_j^2}$$

Therefore,

$$\begin{aligned} M &= \mathbb{E}[\mathbf{softplus}(u + b)] \\ &= \int \mathbf{softplus}(u + b) p(\tau) d\tau \\ &= \int \frac{d}{du} \left[ \int \mathbf{softplus}(u + b) p(\tau) d\tau \right] du \\ &= \int \int \left[ \frac{d}{du} \mathbf{softplus}(u + b) \right] p(\tau) d\tau du \\ &= \int \mathbb{E} \left[ \frac{d}{du} \mathbf{softplus}(u + b) \right] du \\ &= \int_{-\infty}^z \frac{1}{p} \sum_{j=1}^p \Phi \left( \frac{z}{\hat{\sigma}_j} \right) dz \\ &= \frac{1}{p} \sum_{j=1}^p \int_{-\infty}^z \Phi \left( \frac{z}{\hat{\sigma}_j} \right) dz \\ &= \frac{1}{p} \sum_{j=1}^p \left[ z \Phi \left( \frac{z}{\hat{\sigma}_j} \right) + \hat{\sigma}_j \varphi \left( \frac{z}{\hat{\sigma}_j} \right) \right] \\ &= \frac{1}{p} \sum_{j=1}^p \left[ \frac{z}{2} \operatorname{erfc} \left( -\frac{z}{\sqrt{2\hat{\sigma}_j^2}} \right) + \hat{\sigma}_j \varphi \left( \frac{z}{\hat{\sigma}_j} \right) \right] \\ &= Nz + \frac{1}{p} \sum_{j=1}^p \hat{\sigma}_j \varphi \left( \frac{z}{\hat{\sigma}_j} \right) \end{aligned}$$

is the quasilinear bias, where  $\varphi(\cdot)$  is the standard Gaussian pdf. Rewrite for the full layer and get

$$N^{(k)} = \frac{1}{2p} \sum_{j=1}^p \operatorname{erfc} \left( -\frac{z^{(k)}}{\sqrt{2\hat{\sigma}_j^{(k)2}}} \right) \quad (39)$$

$$M^{(k)} = N^{(k)} \odot z^{(k)} + \frac{1}{p} \sum_{j=1}^p \hat{\sigma}_j^{(k)} \odot \varphi \left( \frac{z^{(k)}}{\hat{\sigma}_j^{(k)}} \right) \quad (40)$$

where

$$\hat{\sigma}_j^{(k)2} = \frac{\gamma_j^2 \tilde{\sigma}^{(k)2} + 2}{\gamma_j^2} \quad \text{and} \quad \tilde{\sigma}^{(k)2} = \mathbf{diag} \left( w^{(k)\top} \Sigma^{(k-1)} w^{(k)} \right) \quad (41)$$

#### A.4 DERIVATION OF QUASI-LINEAR GAIN AND BIAS FOR RELU LAYERS

First, consider a single  $i$ -th unit in a ReLU layer. Let  $z_i = w_i^\top x + b_i$ , then the gain of the  $i^{th}$  unit,  $N_i$ , is

$$\begin{aligned} N_i &= \mathbb{E} \left[ \frac{d}{du} \mathbf{ReLU}(u) \right] \\ &= \int_{-z_i}^{\infty} p(\tau_i) d\tau_i \\ &= 1 - \Phi\left(-\frac{z_i}{\tilde{\sigma}_i}\right) \\ &= \frac{1}{2} \left[ 1 + \mathbf{erf}\left(\frac{z_i}{\sqrt{2}\tilde{\sigma}_i}\right) \right] \end{aligned}$$

where  $\tilde{\sigma}_i^2 = w_i^\top \Sigma w_i$ .

The bias of the  $i^{th}$  unit,  $M_i$ , is

$$\begin{aligned} M_i &= \mathbb{E}[\mathbf{ReLU}(u)] \\ &= \int_{-z_i}^{\infty} (z_i + \tau_i) p(\tau_i) d\tau_i \\ &= \underbrace{(z_i) \int_{-z_i}^{\infty} p(\tau_i) d\tau_i}_A + \underbrace{\int_{-z_i}^{\infty} \tau_i p(\tau_i) d\tau_i}_B \\ A &= N_i z_i \\ B &= \text{mean of the unnormalized truncated Gaussian } \mathcal{N}(\tau | 0, w_i^\top \Sigma w_i, -z_i, \infty) \\ &= \tilde{\sigma}_i \varphi\left(-\frac{z_i}{\tilde{\sigma}_i}\right) \end{aligned}$$

Rewrite for the full layer and get

$$N^{(k)} = \frac{1}{2} \left[ 1 + \mathbf{erf}\left(\frac{z^{(k)}}{\sqrt{2}\tilde{\sigma}^{(k)}}\right) \right] \quad (42)$$

$$M^{(k)} = N^{(k)} \odot z^{(k)} + \tilde{\sigma}^{(k)} \odot \varphi\left(-\frac{z^{(k)}}{\tilde{\sigma}^{(k)}}\right) \quad (43)$$

where  $z^{(k)} = w^{(k)\top} M^{(k-1)} + b^{(k)}$ , and

$$\tilde{\sigma}^{(k)^2} = \mathbf{diag}(w^{(k)\top} \Sigma^{(k-1)} w^{(k)}) \quad (44)$$

The SL model of layers with any piece-wise linear activation function (e.g. leaky ReLU) can be obtained in a similar way.

#### A.5 KALMAN SIMULATION DETAILS

The simulated 2D drone environment consisted of a  $180 \times 180$  grid generated according to:

$$B_{m \times m} = 1_{2 \times 2} \otimes B_1 + G \otimes B_2^3 \quad (45)$$

in which  $B_1$  and  $B_2$  are matrices with normally distributed independent entries,  $1_{2 \times 2}$  denotes the  $2 \times 2$  box-smoothing filter and  $G$  denotes the Gaussian filter with standard-deviation 2-pixels. The background ( $B$ ) was then re-scaled to have a maximum absolute value of 3.

The target consisted of a cropped elliptical sinc-function:

$$T(x, y) = 1.5 \mathbf{sinc}\left(1.5 \sqrt{\left(\frac{x}{16}\right)^2 + \left(\frac{y}{14}\right)^2}\right) \quad (46)$$

with integers  $x \in [-16, 16]$  and  $y \in [-14, 14]$ . The function was then cropped to a (discretized) ellipse according to the selection rule:

$$\left(\frac{x}{16}\right)^2 + \left(\frac{y}{14}\right)^2 \leq 1.25 \quad (47)$$

We incorporated targets into the environment by rounding the target’s continuous-valued position and placing the cropped-target image at that location in the environment (on-center).

Both the image generation and object-detection networks were trained using 250,000 exemplars featuring the same target used in testing. The image-generation network was trained to reproduce images in the same environment as testing, whereas the object-detection network was trained using 25,000 simulated environments with 10 images each to reflect a generic sensing network.

We used the image-generation network for static (single time-point) testing in the main text as the combined image-generation and object-detection networks contain fan-out and fan-in architectures, respectively. This test improves generality to other network architectures. However, in application, it is more accurate and tractable to directly model the relationship between true states and network outputs with a single network (i.e., how position and kinematics bias the detected target location), as opposed to first simulating the predicted image (the image-generation network) and then passing it to the object-detection network. Therefore, for testing a dynamic target, we trained a simple network (“auxiliary network”) to directly predict the object-detection network’s output using the same inputs (drone location, target location, and drone velocity). This network contained two fully-connected tanh-layers (40 and 60 units) with fully-connected regression layers for input/output.

All networks were trained in MATLAB R2022B’s Deep Learning package to minimize  $L_2$  loss using ADAM with default parameters ( $\beta_1 = .9$ ,  $\beta_2 = .99$ ) and rate =  $2 \times 10^{-4}$ . Minibatches contained 1000 images and 5,000 additional images were held-out for cross-validation, hence each training epoch contained 250-folds (minibatches). The number of training epochs was tuned based upon visual inspection of cross-validation loss: 100 epochs (25,000 minibatches) for image-generation, 350 epochs (87,500 minibatches) for object-detection, and 500 epochs (125,000 minibatches) for the auxiliary network.

In the static (1-step) simulations in the main text kinematics were ignored as the 1-step prior-distributions do not interact with method (i.e.  $x_{SL}(0) = x_{Jac}(0)$ ) implies ( $Ax_{SL}(0) = Ax_{Jac}(0)$ ). Instead distributions were randomly generated according to:

$$\sqrt{P_{1|0}} = (M_0 + \frac{I_8}{2})\sqrt{\Sigma} \quad (48)$$

with  $M$  randomly generated for each exemplar (normal-iid) and scaling factor  $\sqrt{\Sigma}=.4$  for target/drone velocity and 1 for target/drone position.  $\sqrt{P}$  denotes an arbitrary matrix root ( $P = \sqrt{P}\sqrt{P}^T$ ).

In the dynamic simulation, we modified kinematics to be mean-reverting (ensuring that the drone/target did not fly out of bounds). The full kinematics were:

$$z := \begin{bmatrix} z_{drone} \\ z_{targ} \end{bmatrix} := \begin{bmatrix} pos_{drone-x} \\ pos_{drone-y} \\ vel_{drone-x} \\ vel_{drone-y} \\ postarg-x \\ postarg-y \\ vel_{targ-x} \\ vel_{targ-y} \end{bmatrix} \quad (49)$$

$$z_{drone}(t+1) = \begin{bmatrix} (1-\alpha_D)I_2 & .25I_2 \\ -\beta_D I_2 & .9I_2 \end{bmatrix} + \frac{m-k}{2} \begin{bmatrix} \alpha_D \\ \alpha_D \\ \beta_D \\ \beta_D \end{bmatrix} + \eta_{drone} \quad (50)$$

$$z_{targ}(t+1) = \begin{bmatrix} (1-\alpha_T)I_2 & .25I_2 \\ -\beta_T I_2 & .9I_2 \end{bmatrix} + \frac{m}{2} + \begin{bmatrix} \alpha_T \\ \alpha_T \\ \beta_T \\ \beta_T \end{bmatrix} + \eta_{targ} \quad (51)$$

with  $\alpha_D = .1, \beta_D = .01, \alpha_T = .1, \beta_T = .05, m = 240$  denoting the (square) environment's width and  $k$  denoting the square field-of-view width for the drone's camera.  $\eta_{drone}$  was Gaussian distributed with  $\text{var} = 2$  for position and  $.6$  for velocity.  $\eta_{targ}$  was the sum of a Gaussian process ( $\text{var}=.4$  for position and  $1$  for velocity) and the 5-step moving-average of a Gaussian process following the same distribution.

In addition to camera-images, the drone received simulated onboard sensor-estimates (i.e., GPS) of its current position and velocity with noise variances of  $1$  and  $.5$ , respectively. These readings were combined with the image measurements during Kalman filtering. Motion blur was simulated using the MATLAB image-processing toolbox using polar-coordinates of drone velocity to parameterize the angle and magnitude of the motion kernel.
